# Supplementary material for: Novel Simple Conjugation Chemistries for Decoration of GMMA with Heterologous Antigens
Source: MDPI journal article supplement (doi:10.3390/ijms221910180), 2021-09-22
Supplement: s1 [file s1]

# Novel simple conjugation chemistries for decoration of GMMA with heterologous antigens

Roberta Di Benedetto <sup>1</sup>, Renzo Alfini <sup>1</sup>, Martina Carducci <sup>1</sup>, Maria Grazia Aruta <sup>1</sup>, Luisa Lanzilao <sup>1#</sup>, Alessandra Acquaviva <sup>1</sup>, Elena Palmieri <sup>1</sup>, Carlo Giannelli <sup>1</sup>, Francesca Necchi <sup>1</sup>, Allan Saul <sup>1†</sup> and Francesca Micoli <sup>1,\*</sup>

<sup>1</sup> GSK Vaccines Institute for Global Health (GVGH), Via Fiorentina 1, 53100 Siena, Italy; [roberta.x.di-benedetto@gsk.com](mailto:roberta.x.di-benedetto@gsk.com) (R.D.B.); [renzo.x.alfini@gsk.com](mailto:renzo.x.alfini@gsk.com) (R.A.); [martina.x.carducci@gsk.com](mailto:martina.x.carducci@gsk.com) (M.C.); [maria-grazia.x.aruta@gsk.com](mailto:maria-grazia.x.aruta@gsk.com) (M.G.A.); [lanzilaol@aou-careggi.toscana.it](mailto:lanzilaol@aou-careggi.toscana.it) (L.L.); [alessandra.x.acquaviva@gsk.com](mailto:alessandra.x.acquaviva@gsk.com) (A.A.); [elena.x.palmieri@gsk.com](mailto:elena.x.palmieri@gsk.com) (E.P.); [carlo.x.giannelli@gsk.com](mailto:carlo.x.giannelli@gsk.com) (C.G.), [francesca.x.necchi@gsk.com](mailto:francesca.x.necchi@gsk.com) (F.N.), [allan.saul@honorary.burnet.edu.au](mailto:allan.saul@honorary.burnet.edu.au) (A.S.)

# Was GSK employee at the time of the study was performed, currently General Laboratory, AOU-Careggi, 50139 Firenze, Italy

† Was GSK employee at the time of the study was performed, currently Burnet Institute, Melbourne, Australia

\* Correspondence: [francesca.x.micoli@gsk.com](mailto:francesca.x.micoli@gsk.com) (F.M.); Tel.: +39 346 2517893

**Table S1.** DoE approach applied to GMMA oxidation: summary of conditions tested.

| Std | Run            | Factor 1          | Factor 2                     | Factor 3 |
|-----|----------------|-------------------|------------------------------|----------|
|     |                | A:[GMMA]<br>mg/mL | B:[NaIO <sub>4</sub> ]<br>mM | C:pH     |
| 19  | 1              | 2100              | 2.75                         | 6.5      |
| 14  | 2              | 2100              | 2.75                         | 8        |
| 2   | 3              | 4000              | 0.5                          | 5        |
| 13  | 4              | 2100              | 2.75                         | 5        |
| 3   | 5              | 200               | 5                            | 5        |
| 18  | 6              | 2100              | 2.75                         | 6.5      |
| 9   | 7 <sup>1</sup> | 200               | 2.75                         | 6.5      |
| 10  | 8              | 4000              | 2.75                         | 6.5      |
| 12  | 9              | 2100              | 5                            | 6.5      |
| 16  | 10             | 2100              | 2.75                         | 6.5      |
| 11  | 11             | 2100              | 0.5                          | 6.5      |
| 1   | 12             | 200               | 0.5                          | 5        |
| 15  | 13             | 2100              | 2.75                         | 6.5      |
| 17  | 14             | 2100              | 2.75                         | 6.5      |
| 5   | 15             | 200               | 0.5                          | 8        |
| 7   | 16             | 200               | 5                            | 8        |
| 20  | 17             | 2100              | 2.75                         | 6.5      |
| 8   | 18             | 4000              | 5                            | 8        |
| 6   | 19             | 4000              | 0.5                          | 8        |
| 4   | 20             | 4000              | 5                            | 5        |

<sup>1</sup> There was an error during the execution of this run..

Starting GMMA having particle size of 51.6 nm (r. by dls) and OAg length of 30564 Da (by HPLC-SEC).

**(a)**

**Response** **OAg size (MP dRI)**

These rows were ignored for this analysis.

7

**ANOVA for Response Surface Reduced 2FI model**

**Analysis of variance table [Partial sum of squares - Type III]**

| Source                 | Sum of Squares | df | Mean Square | F Value | p-value Prob > F             |
|------------------------|----------------|----|-------------|---------|------------------------------|
| Model                  | 8.41E+08       | 4  | 2.10E+08    | 74.540  | < 0.0001 <i>significant</i>  |
| A-[GMMA]               | 8.29E+07       | 1  | 8.29E+07    | 29.370  | < 0.0001                     |
| B-[NaIO <sub>4</sub> ] | 7.16E+08       | 1  | 7.16E+08    | 253.860 | < 0.0001                     |
| C-pH                   | 2.66E+07       | 1  | 2.66E+07    | 9.430   | 0.008                        |
| AB                     | 1.55E+07       | 1  | 1.55E+07    | 5.500   | 0.034                        |
| Residual               | 3.95E+07       | 14 | 2.82E+06    |         |                              |
| Lack of Fit            | 3.35E+07       | 9  | 3.72E+06    | 3.110   | 0.112 <i>not significant</i> |
| Pure Error             | 5.99E+06       | 5  | 1.20E+06    |         |                              |
| Cor Total              | 8.81E+08       | 18 |             |         |                              |

|                   |           |                |         |
|-------------------|-----------|----------------|---------|
| Std. Dev.         | 1679.610  | R-Squared      | 0.955   |
| Mean              | 20888.950 | Adj R-Squared  | 0.942   |
| C.V. %            | 8.040     | Pred R-Squared | 0.898   |
| PRESS             | 9.01E+07  | Adeq Precision | 30.493  |
| -2 Log Likelihood | 330.320   | BIC            | 345.040 |
|                   |           | AICc           | 344.930 |

**Final Equation in Terms of Actual Factors:**

$$\begin{aligned}
 \text{OAg size (MP dRI)} = & 22521.574070 \\
 & 0.705910 * [\text{GMMA}] \\
 & -4445.173680 * [\text{NaIO}_4] \\
 & 1087.400000 * \text{pH} \\
 & 0.325700 * [\text{GMMA}] * [\text{NaIO}_4]
 \end{aligned}$$

(b)

**Figure S1.** Identification of optimal conditions for GMMA oxidation: statistical analysis of the models for % GMMA oxidation (a) and OAg size (b)

**Table S2.** DoE approach applied to GMMA activation with BS3: summary of conditions tested.

| Block | Run | Factor 1 | Factor 2 | Factor 3                                                       |
|-------|-----|----------|----------|----------------------------------------------------------------|
|       |     | pH       | [GMMA]   | BS3<br>concentration<br>(eq BS3 to NH <sub>2</sub><br>on GMMA) |
|       |     |          | mg/mL    | mg/mL (eq)                                                     |
| Day 1 | 1   | 6        | 0.2      | 1.2 (5)                                                        |
| Day 1 | 2   | 9        | 0.2      | 3.6 (15)                                                       |
| Day 1 | 3   | 7.5      | 2.1      | 25.2 (10)                                                      |
| Day 1 | 4   | 9        | 4        | 72.1 (15)                                                      |
| Day 1 | 5   | 9        | 0.2      | 1.2 (5)                                                        |
| Day 1 | 6   | 6        | 4        | 72.1 (15)                                                      |
| Day 1 | 7   | 6        | 4        | 24 (5)                                                         |
| Day 1 | 8   | 7.5      | 2.1      | 25.2 (10)                                                      |
| Day 1 | 9   | 7.5      | 2.1      | 25.2 (10)                                                      |
| Day 1 | 10  | 9        | 4        | 24 (5)                                                         |
| Day 1 | 11  | 6        | 0.2      | 3.6 (15)                                                       |
| Day 1 | 12  | 7.5      | 2.1      | 25.2 (10)                                                      |
| Day 2 | 13  | 7.5      | 2.1      | 12.6 (5)                                                       |
| Day 2 | 14  | 7.5      | 4        | 48.1 (10)                                                      |
| Day 2 | 15  | 6        | 2.1      | 25.2 (10)                                                      |
| Day 2 | 16  | 7.5      | 2.1      | 25.2 (10)                                                      |
| Day 2 | 17  | 7.5      | 2.1      | 37.8 (15)                                                      |
| Day 2 | 18  | 7.5      | 0.2      | 2.4 (10)                                                       |
| Day 2 | 19  | 9        | 2.1      | 25.2 (10)                                                      |
| Day 2 | 20  | 7.5      | 2.1      | 25.2 (10)                                                      |

**% NH2 activation (TNBS)**

**Analysis of variance table [Partial sum of squares - Type III]**

| Source                  | Sum of Squares | df | Mean Square | F Value  | p-value Prob > F                |
|-------------------------|----------------|----|-------------|----------|---------------------------------|
| Block                   | 128.1687       | 1  | 128.1687011 |          |                                 |
| Model                   | 1735.712       | 10 | 173.5711605 | 53.46789 | 3.15E-06 <i>significant</i>     |
| A-pH                    | 308.1359       | 1  | 308.1359333 | 94.92002 | 1.03E-05                        |
| B-[GMMA]                | 738.1734       | 1  | 738.1733798 | 227.3913 | 3.7E-07                         |
| C-eq BS3 to NH2 on GMMA | 241.241        | 1  | 241.2409902 | 74.3133  | 2.54E-05                        |
| AB                      | 41.05079       | 1  | 41.05079148 | 12.64553 | 0.007443                        |
| AC                      | 0.074411       | 1  | 0.074411136 | 0.022922 | 0.883408                        |
| BC                      | 35.64661       | 1  | 35.6466111  | 10.98079 | 0.010639                        |
| A^2                     | 73.11089       | 1  | 73.11088939 | 22.52151 | 0.001453                        |
| B^2                     | 25.36879       | 1  | 25.36879225 | 7.814753 | 0.02336                         |
| C^2                     | 15.60412       | 1  | 15.60412436 | 4.806787 | 0.059694                        |
| ABC                     | 38.12519       | 1  | 38.12518624 | 11.74431 | 0.008995                        |
| Residual                | 25.97015       | 8  | 3.246269198 |          |                                 |
| Lack of Fit             | 15.38771       | 4  | 3.846926685 | 1.454078 | 0.362811 <i>not significant</i> |
| Pure Error              | 10.58245       | 4  | 2.645611711 |          |                                 |
| Cor Total               | 1889.85        | 19 |             |          |                                 |

|                   |          |                |          |
|-------------------|----------|----------------|----------|
| Std. Dev.         | 1.801741 | R-Squared      | 0.985258 |
| Mean              | 51.63048 | Adj R-Squared  | 0.966831 |
| C.V. %            | 3.489684 | Pred R-Squared | 0.70962  |
| PRESS             | 511.5576 | Adeq Precision | 30.43426 |
| -2 Log Likelihood | 61.98185 | BIC            | 97.93064 |
|                   |          | AICc           | 130.5533 |

% NH<sub>2</sub> activation =

```
-141.803
  40.1702 * pH
11.40516 * [GMMA]
4.953846 * eq BS3 to NH2 on GMMA
-0.73713 * pH * [GMMA]
-0.33457 * pH * eq BS3 to NH2 on GMMA
-0.92677 * [GMMA] * eq BS3 to NH2 on GMMA
-2.31953 * pH^2
  -0.8516 * [GMMA]^2
-0.09644 * eq BS3 to NH2 on GMMA^2
0.153196 * pH * [GMMA] * eq BS3 to NH2 on GMMA
```

**(a)**

**Response** **% active ester groups (HPLC-SEC)**

These rows were ignored for this analysis.

10

**ANOVA for Response Surface Reduced Quadratic model**

**Analysis of variance table [Partial sum of squares - Type III]**

| Source                  | Sum of Squares | df | Mean Square    | F Value  | p-value Prob > F                |
|-------------------------|----------------|----|----------------|----------|---------------------------------|
| Block                   | 328.6142       | 1  | 328.6141536    |          |                                 |
| Model                   | 673.5975       | 5  | 134.7195007    | 9.402123 | 0.000778 <i>significant</i>     |
| A-pH                    | 12.15521       | 1  | 12.15521342    | 0.848317 | 0.375175                        |
| B-[GMMA]                | 225.14         | 1  | 225.1400244    | 15.7126  | 0.00188                         |
| C-eq BS3 to NH2 on GMMA | 244.837        | 1  | 244.8370265    | 17.08727 | 0.001386                        |
| A^2                     | 126.9122       | 1  | 126.9122129    | 8.85725  | 0.011569                        |
| C^2                     | 165.231        | 1  | 165.2309933    | 11.53153 | 0.005311                        |
| Residual                | 171.9435       | 12 | 14.32862531    |          |                                 |
| Lack of Fit             | 129.8367       | 8  | 16.22958835    | 1.541755 | 0.356404 <i>not significant</i> |
| Pure Error              | 42.1068        | 4  | 10.52669924    |          |                                 |
| Cor Total               | 1174.155       | 18 |                |          |                                 |
| Std. Dev.               | 3.785317       |    | R-Squared      | 0.796647 |                                 |
| Mean                    | 19.33909       |    | Adj R-Squared  | 0.711916 |                                 |
| C.V. %                  | 19.5734        |    | Pred R-Squared | 0.45243  |                                 |
| PRESS                   | 462.9929       |    | Adeq Precision | 11.9817  |                                 |
| -2 Log Likelihood       | 95.77148       |    | BIC            | 116.3825 |                                 |
|                         |                |    | AICc           | 119.9533 |                                 |

**Final Equation in Terms of Actual Factors:**

gruppi reattivi / GMMA  
 143.4041  
 -44.1813 \* pH  
 2.703501 \* [GMMA]  
 7.011795 \* eq BS3 to NH2 on GMMA  
 2.892371 \* pH^2  
 -0.29702 \* eq BS3 to NH2 on GMMA^2

(b)

**Figure S2.** Identification of optimal conditions for GMMA derivatization with BS3: statistical analysis of the models for % NH<sub>2</sub> activation (a) and % active ester groups introduced (b). Row 10 was ignored in (b) as the sample was erroneously poured out before analysis.

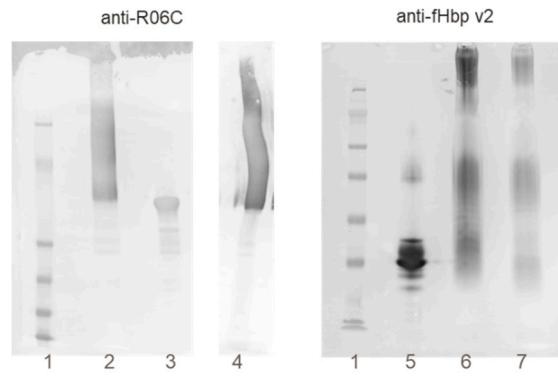

**Figure S3.** Characterization by WB analysis of GMMA-R06C and GMMA-fHbp v2 conjugates produced by reductive amination and BS3 chemistries respectively in comparison to corresponding unconjugated proteins. Ten  $\mu\text{g}$  of conjugates and 2  $\mu\text{g}$  of protein were loaded per well. Lane 1: marker, lane 2: STm GMMAox-R06C recycled, lane 3: R06C, lane 4: STm GMMAox-R06C, lane 5: fHbp v2, lane 6: STm GMMA-BS3-fHbp v2, lane 7: STm GMMA-BS3-fHbp v2 recycled.

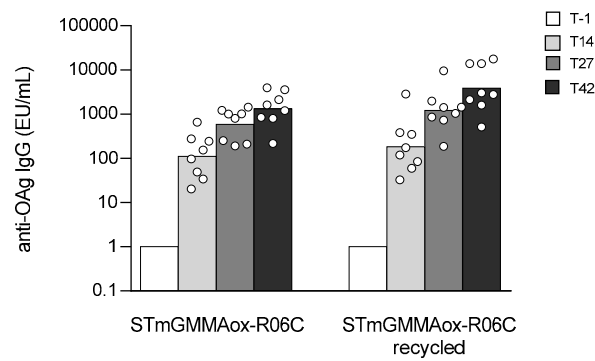

**Figure S4.** Immunogenicity of R06C-GMMA conjugates (reductive amination chemistry) in mice. CD1 mice were immunized subcutaneously at day 0 and 28 with 36  $\mu\text{g}$  and 56  $\mu\text{g}$  total protein dose (corresponding to 4  $\mu\text{g}$  R06C/dose) for the R06C non-recycled and recycled conjugates respectively. All constructs were formulated with 0.7 mg/mL Alhydrogel. Sera were analyzed at days -1, 14, 27 and 42 by ELISA using as coating antigen STm OAg. Summary graphs of anti-antigen specific IgG geometric mean units (bars) and individual antibody levels (dots) are reported.

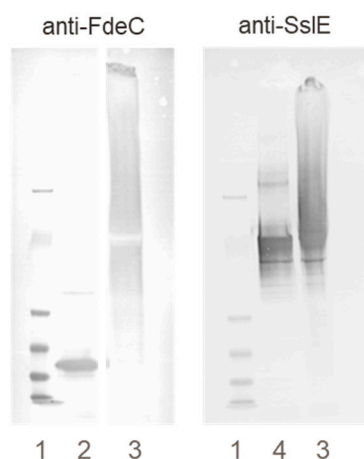

(a)

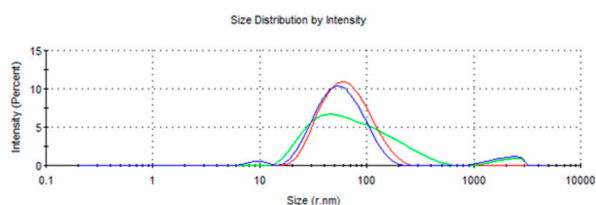

(b)

**Figure S5.** Bivalent conjugate characterization by WB and dls analyses. (a) WB analysis of the conjugate in comparison to corresponding unconjugated proteins. Ten  $\mu\text{g}$  of conjugate and 2  $\mu\text{g}$  of proteins were loaded per well. Lane 1: marker, lane 2: FdeC, lane 3: orthogonal bivalent conjugate, lane 4: SsIE. (b) dls analysis of *S. sonnei* GMMA (red line, Z average r of 56.3 nm, PdI of 0.197), *S. sonnei* GMMA-BS3 (green line, Z average r of 58.1 nm, PdI of 0.409) and bivalent conjugate (blue line, Z average r of 51.4 nm, PdI of 0.316), confirming no crosslinking after conjugation.

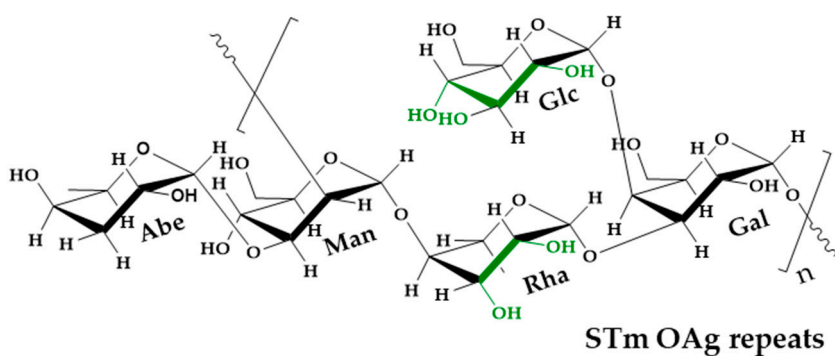

**Figure S6.** Vicinal diols, in STm GMMA OAg, which are susceptible to oxidation with  $\text{NaIO}_4$ : present at the Rha and Glc residues, highlighted in green.
